# Supplementary material for: A Kinetic Map of the Homomeric Voltage-Gated Potassium Channel (Kv) Family
Source: PubMed Central journal article supplement (PMC6710402; doi:10.3389/fncel.2019.00358), 2019-08-20

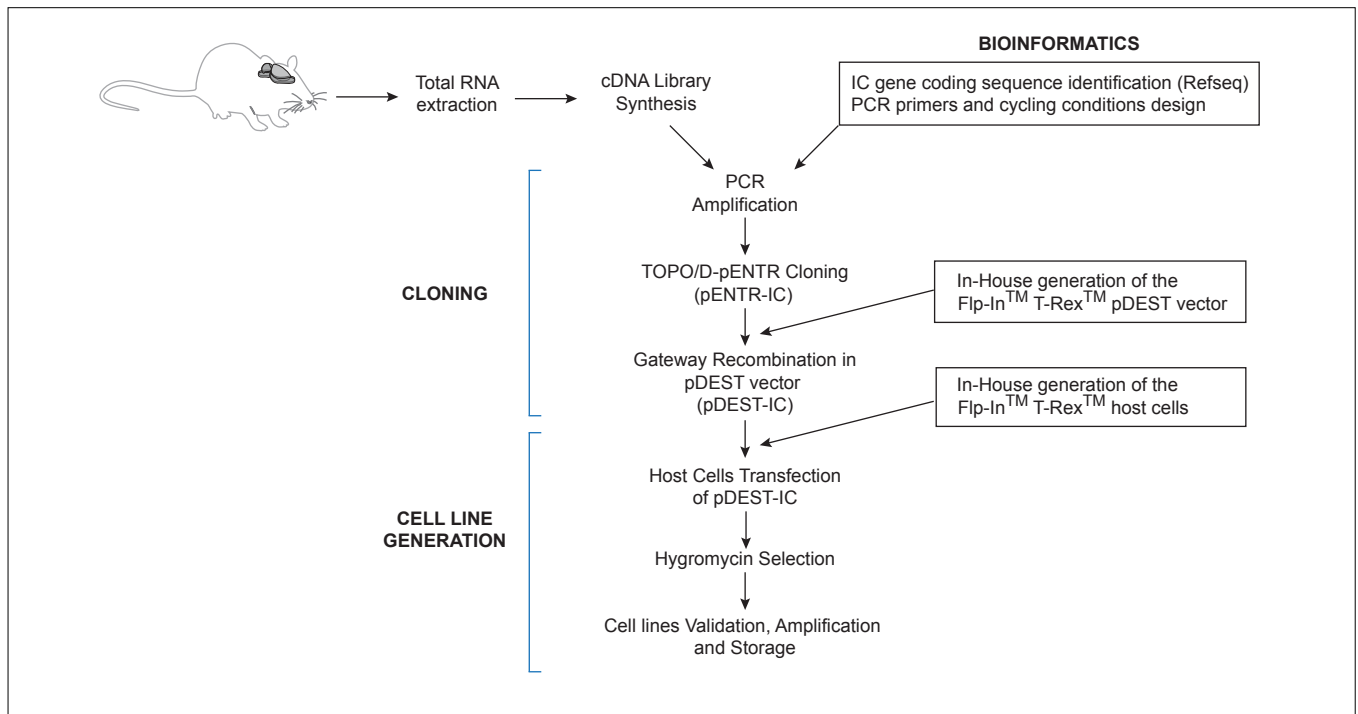

**Figure S1 | The standardized cell line generation workflow, related to Figure 1C**

A cDNA library is generated by reverse transcription of total RNA extracted from different rat brain regions (cerebellum, cortex or mixed regions) (see Method "RNA isolation and cDNA library synthesis"). In parallel, each Kv gene coding sequence (isoform 1) is retrieved from databases (GenBank, Ensembl). Specific primers (Table S6) and cycling conditions are designed for the amplification of each individual Kv gene.

**Cloning:** each Kv gene is amplified by PCR and cloned via a 2-steps cloning procedure based on the gateway® strategy (see Methods "IC gene amplification" and "IC gene cloning"), in a mammalian-expression vector suitable for the Flp-In<sup>TM</sup>-Rex<sup>TM</sup> expression system (in-house generated pDEST as described in Method "IC gene cloning"). The collection of pDEST-IC (expression vector containing an IC gene) is properly stored and catalogued.

**Cell line generation:** a stable and inducible cell line is generated for each Kv gene by transfection of the pDEST-IC in a Flp-In<sup>TM</sup>-Rex<sup>TM</sup> (FT) host cell line (CHO-FT, CV1-FT or HEK-FT: CHO-FT and CV1-FT were in-house generated as described in Method "Cell lines handling and maintenance"), followed by 2-3 weeks Hygromycin selection. Each cell line is validated (Figure S2) before being amplified, stored and catalogued.

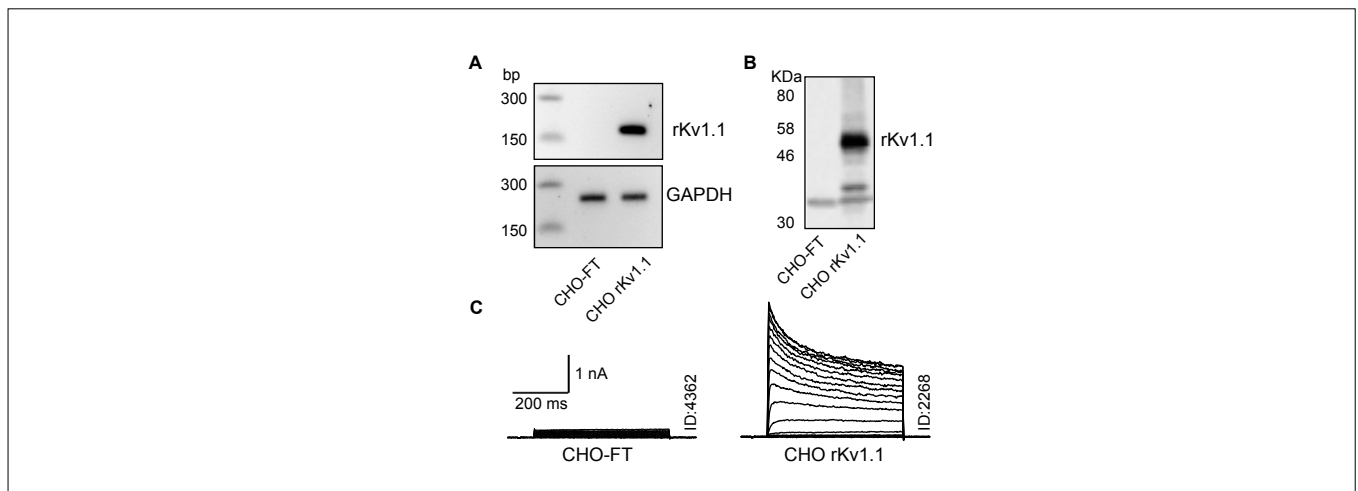

**Figure S2 | The CHO rKv1.1 cell line validation, related to Figure 1**

CHO-FT (as control) and CHO rKv1.1 cell lines are treated 24 h with tetracycline (see Method "Induction of IC expression") to induce Kv gene expression, and analyzed for gene expression (A), protein expression (B) and electrical response (C).

(A) rKv1.1 mRNA expression tested by RT-PCR; GAPDH mRNA expression tested as control (see Method "Cell line validation by RT-PCR"). (B) rKv1.1 protein overexpression tested by western-blot. (C) Current response to whole-cell voltage-clamp activation protocol performed at 25°C. Each cell line is tested for specific gene expression and electrical response before kinetic characterization (see datasheet on Channelpedia); western-blot is additionally performed upon availability of antibody.

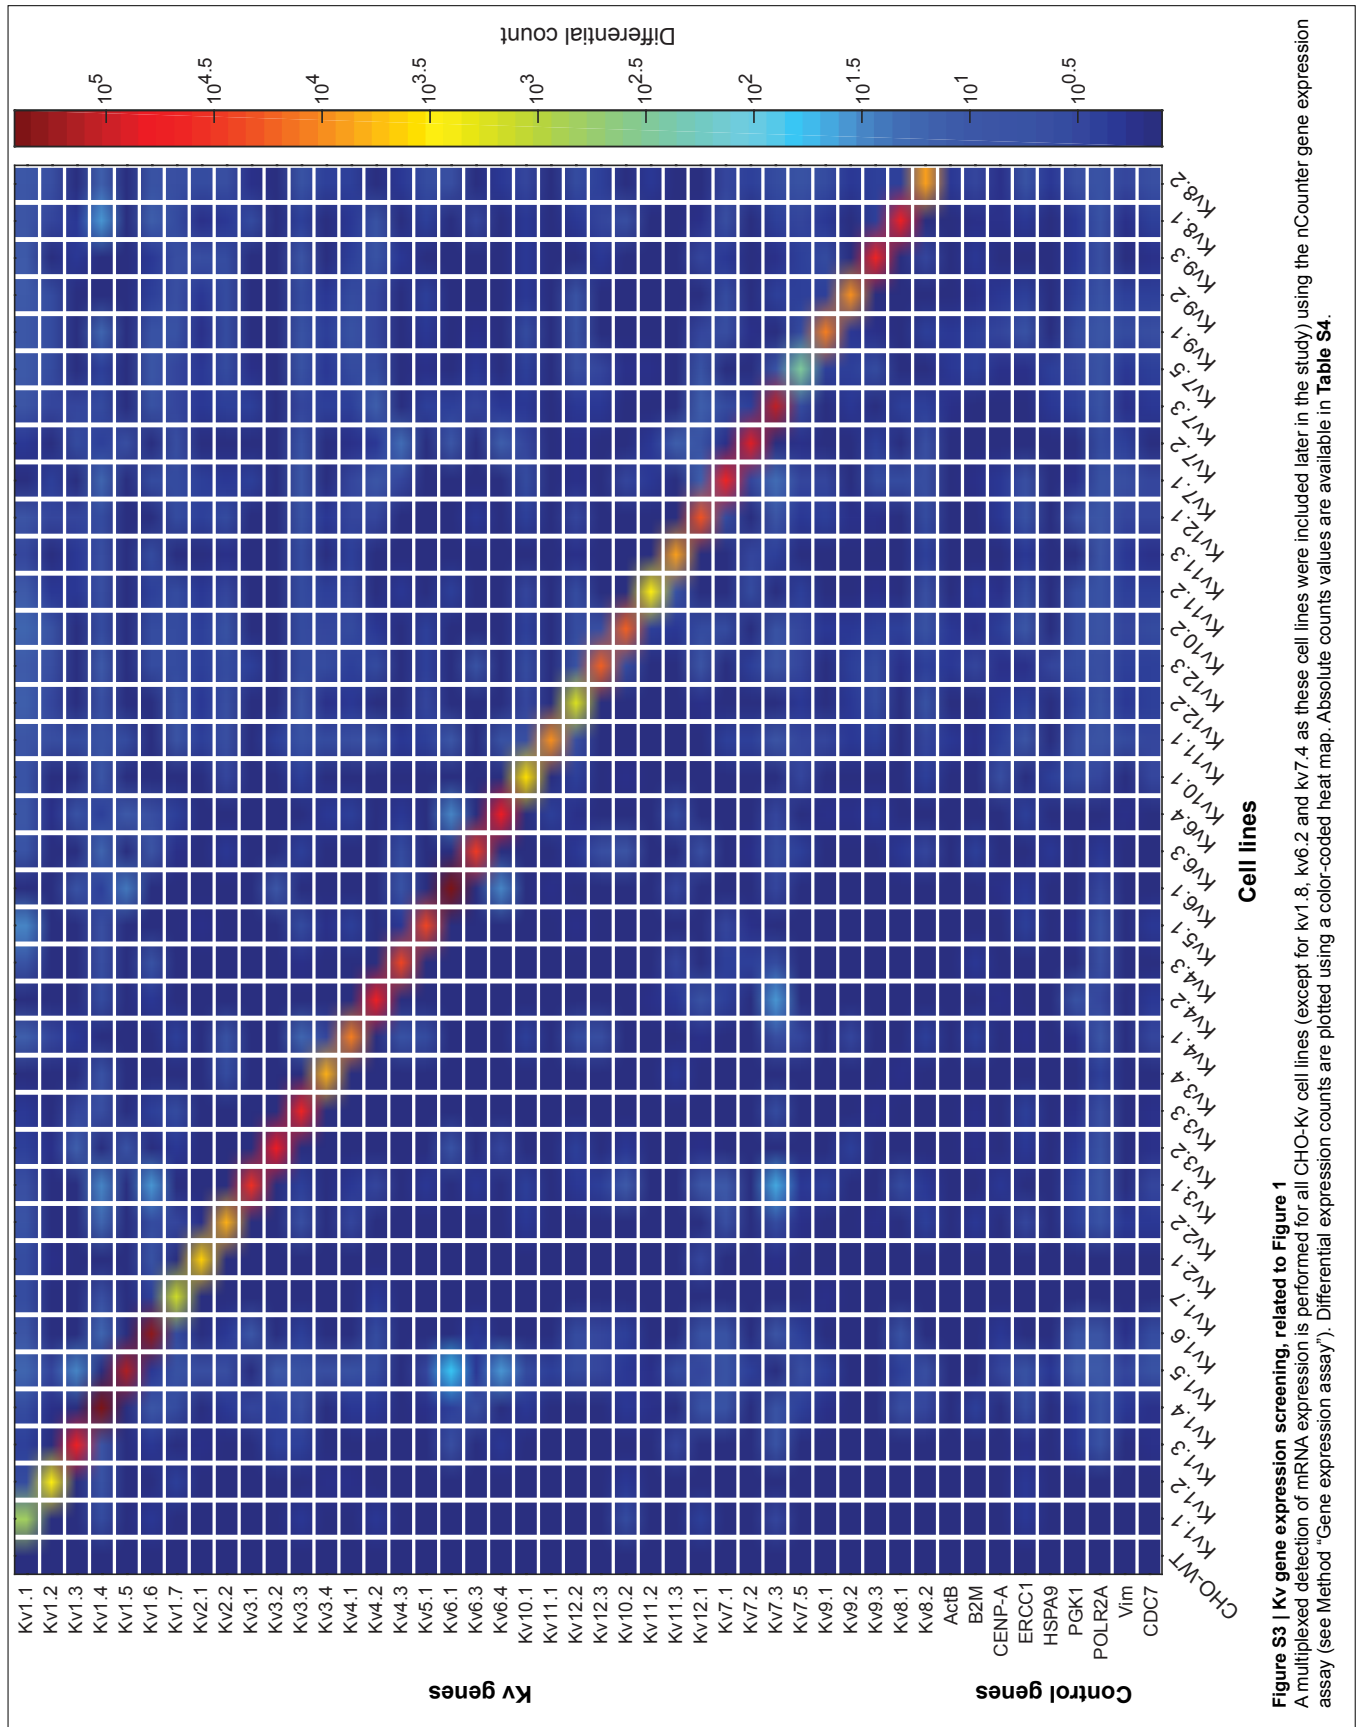

**Figure S3 | Kv gene expression screening, related to Figure 1**  
 A multiplexed detection of mRNA expression is performed for all CHO-Kv cell lines (except for kv1.8, kv6.2 and kv7.4 as these cell lines were included later in the study) using the nCounter gene expression assay (see Method "Gene expression assay"). Differential expression counts are plotted using a color-coded heat map. Absolute counts values are available in **Table S4**.

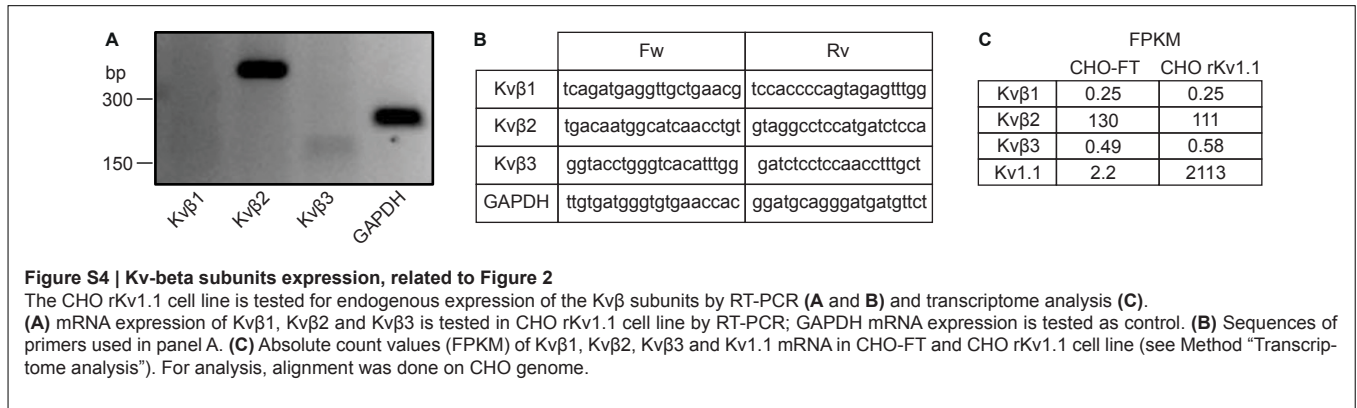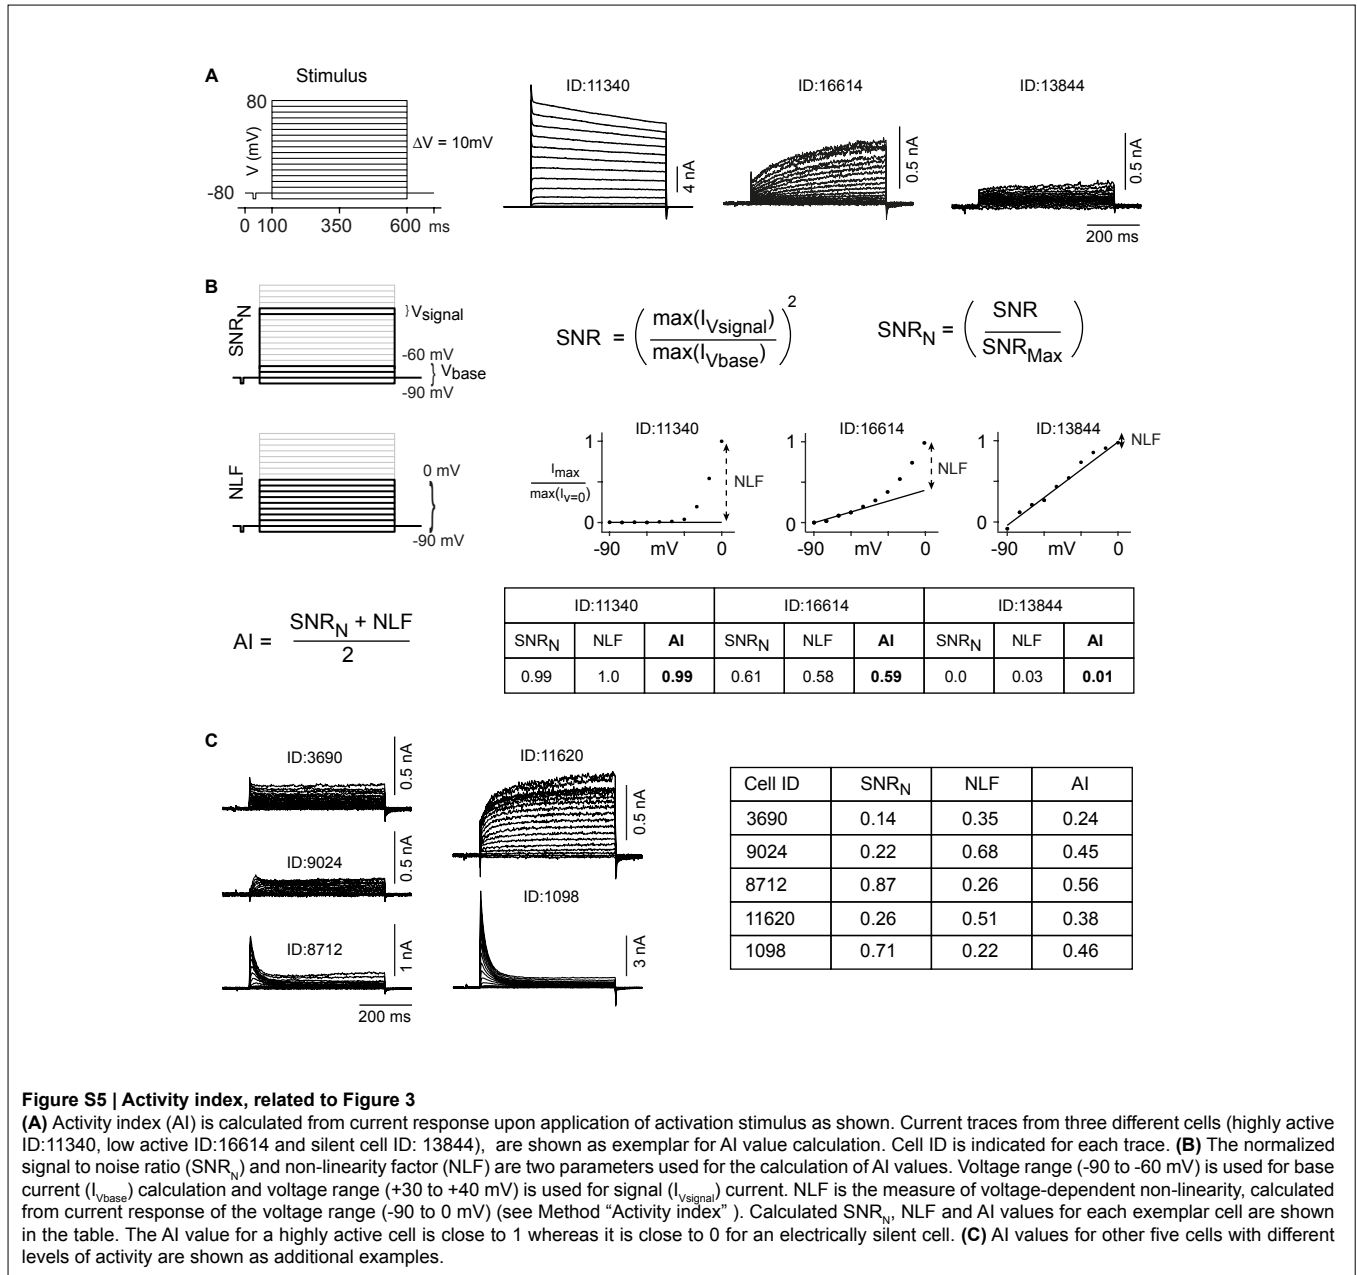

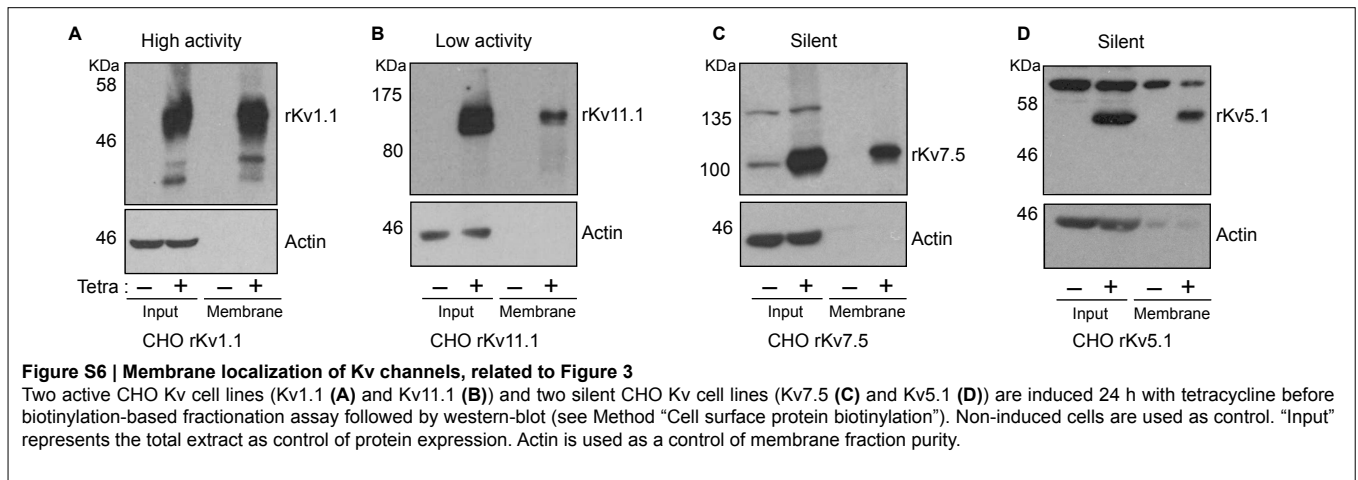

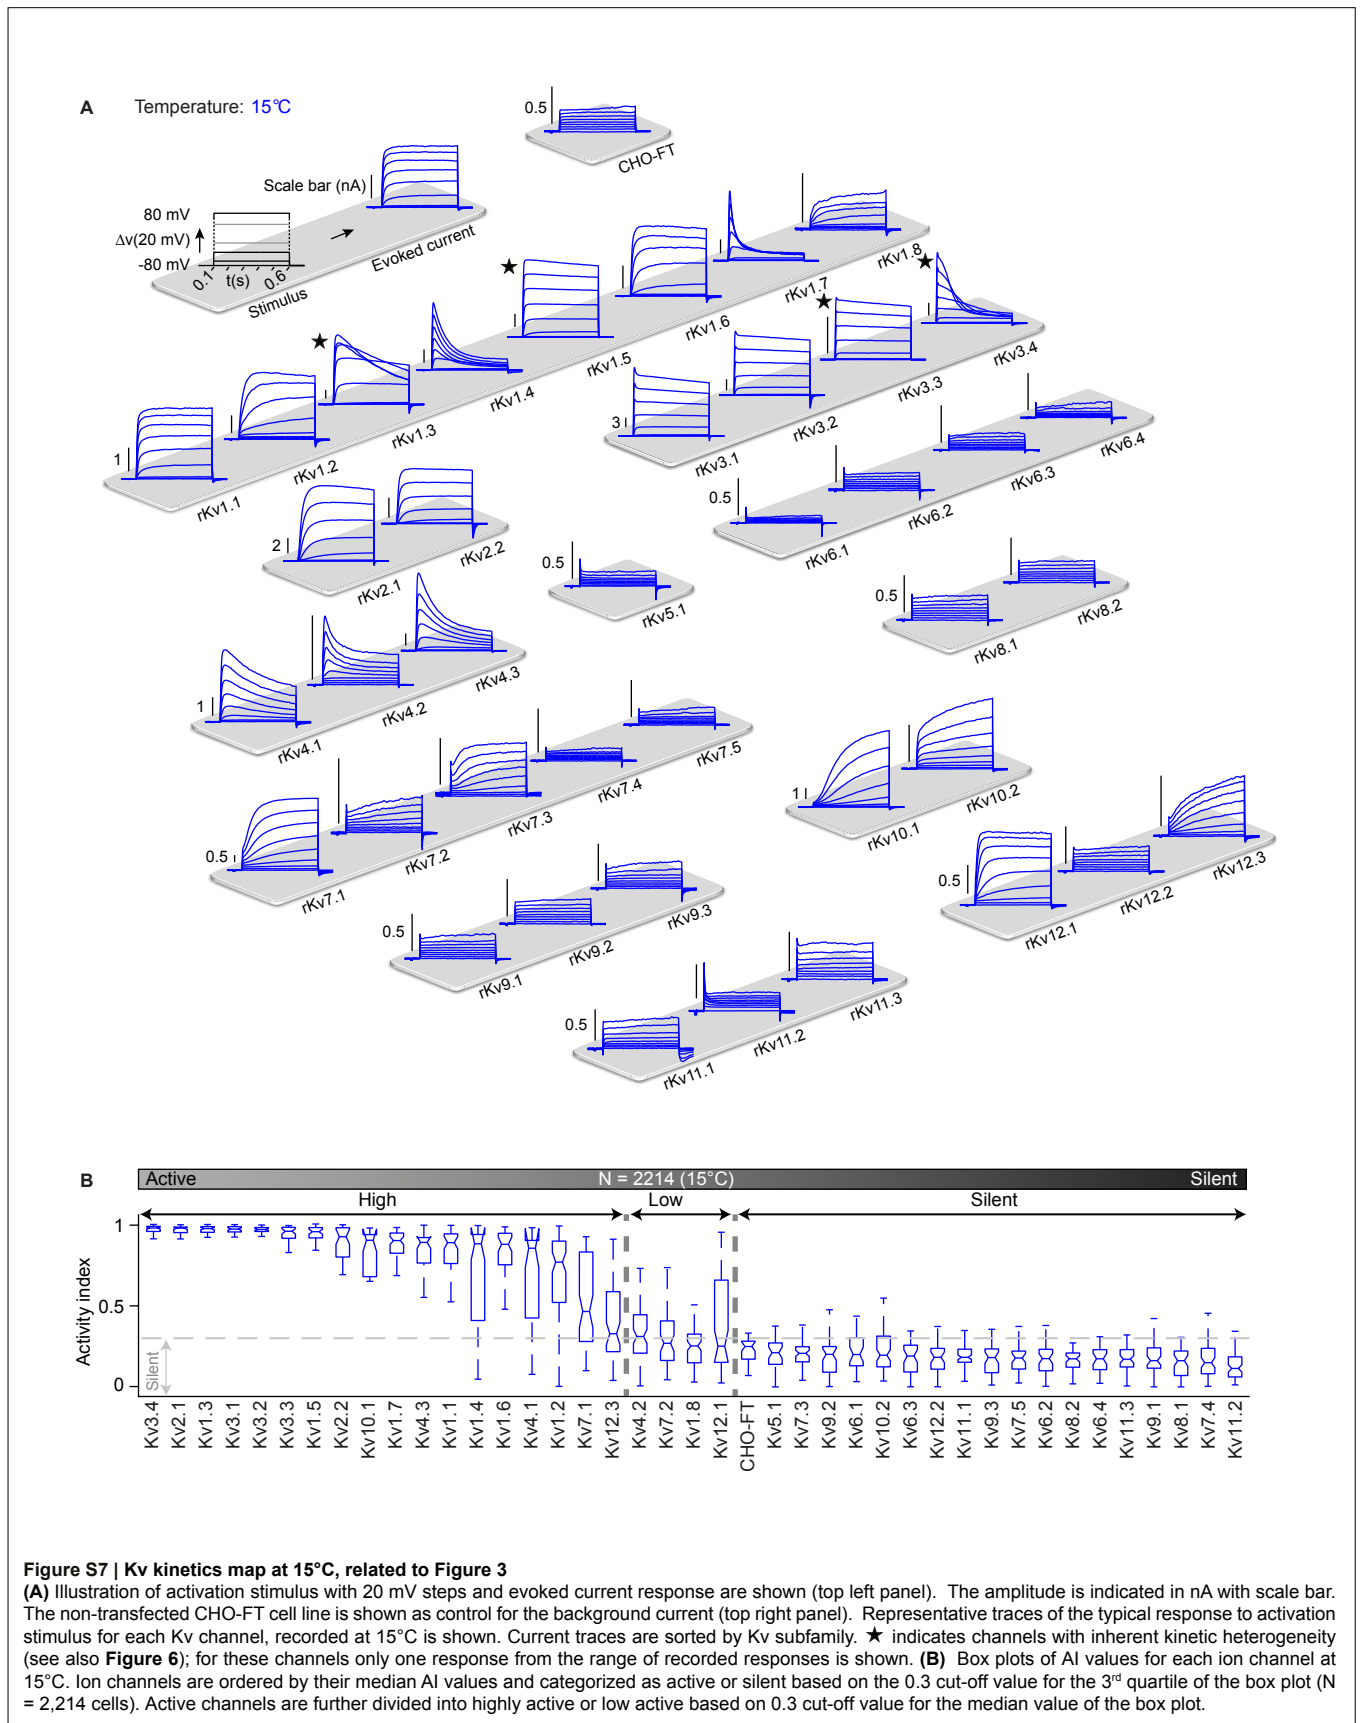

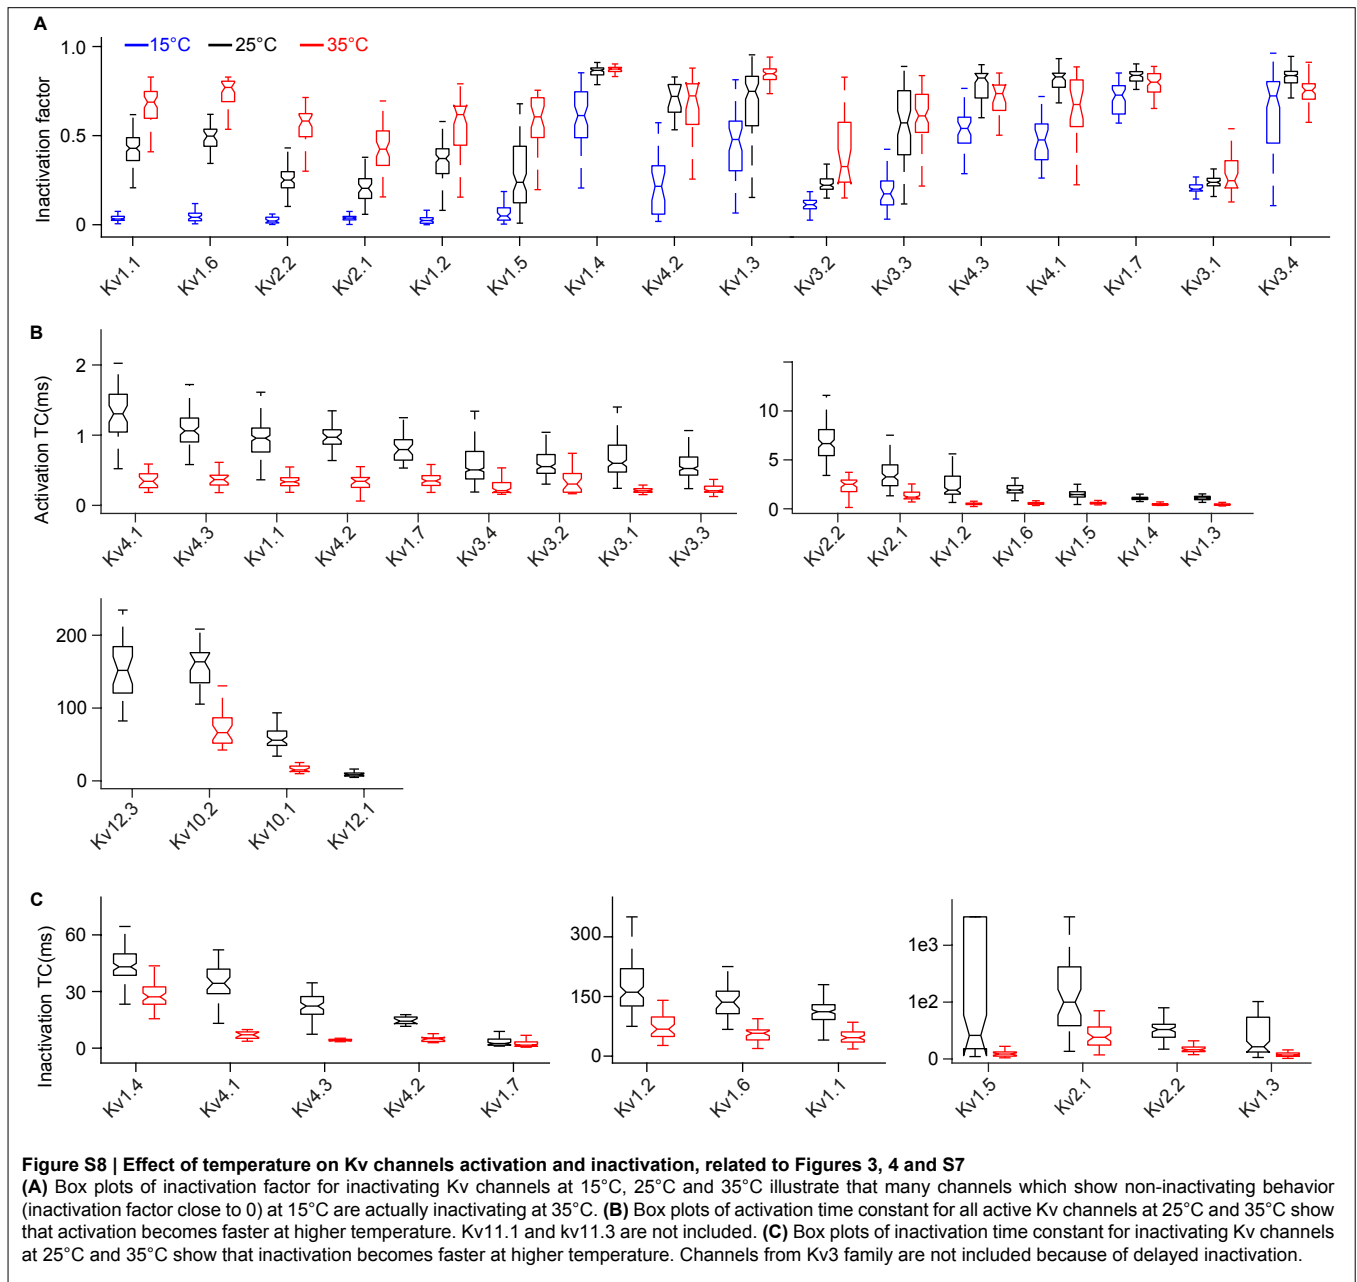

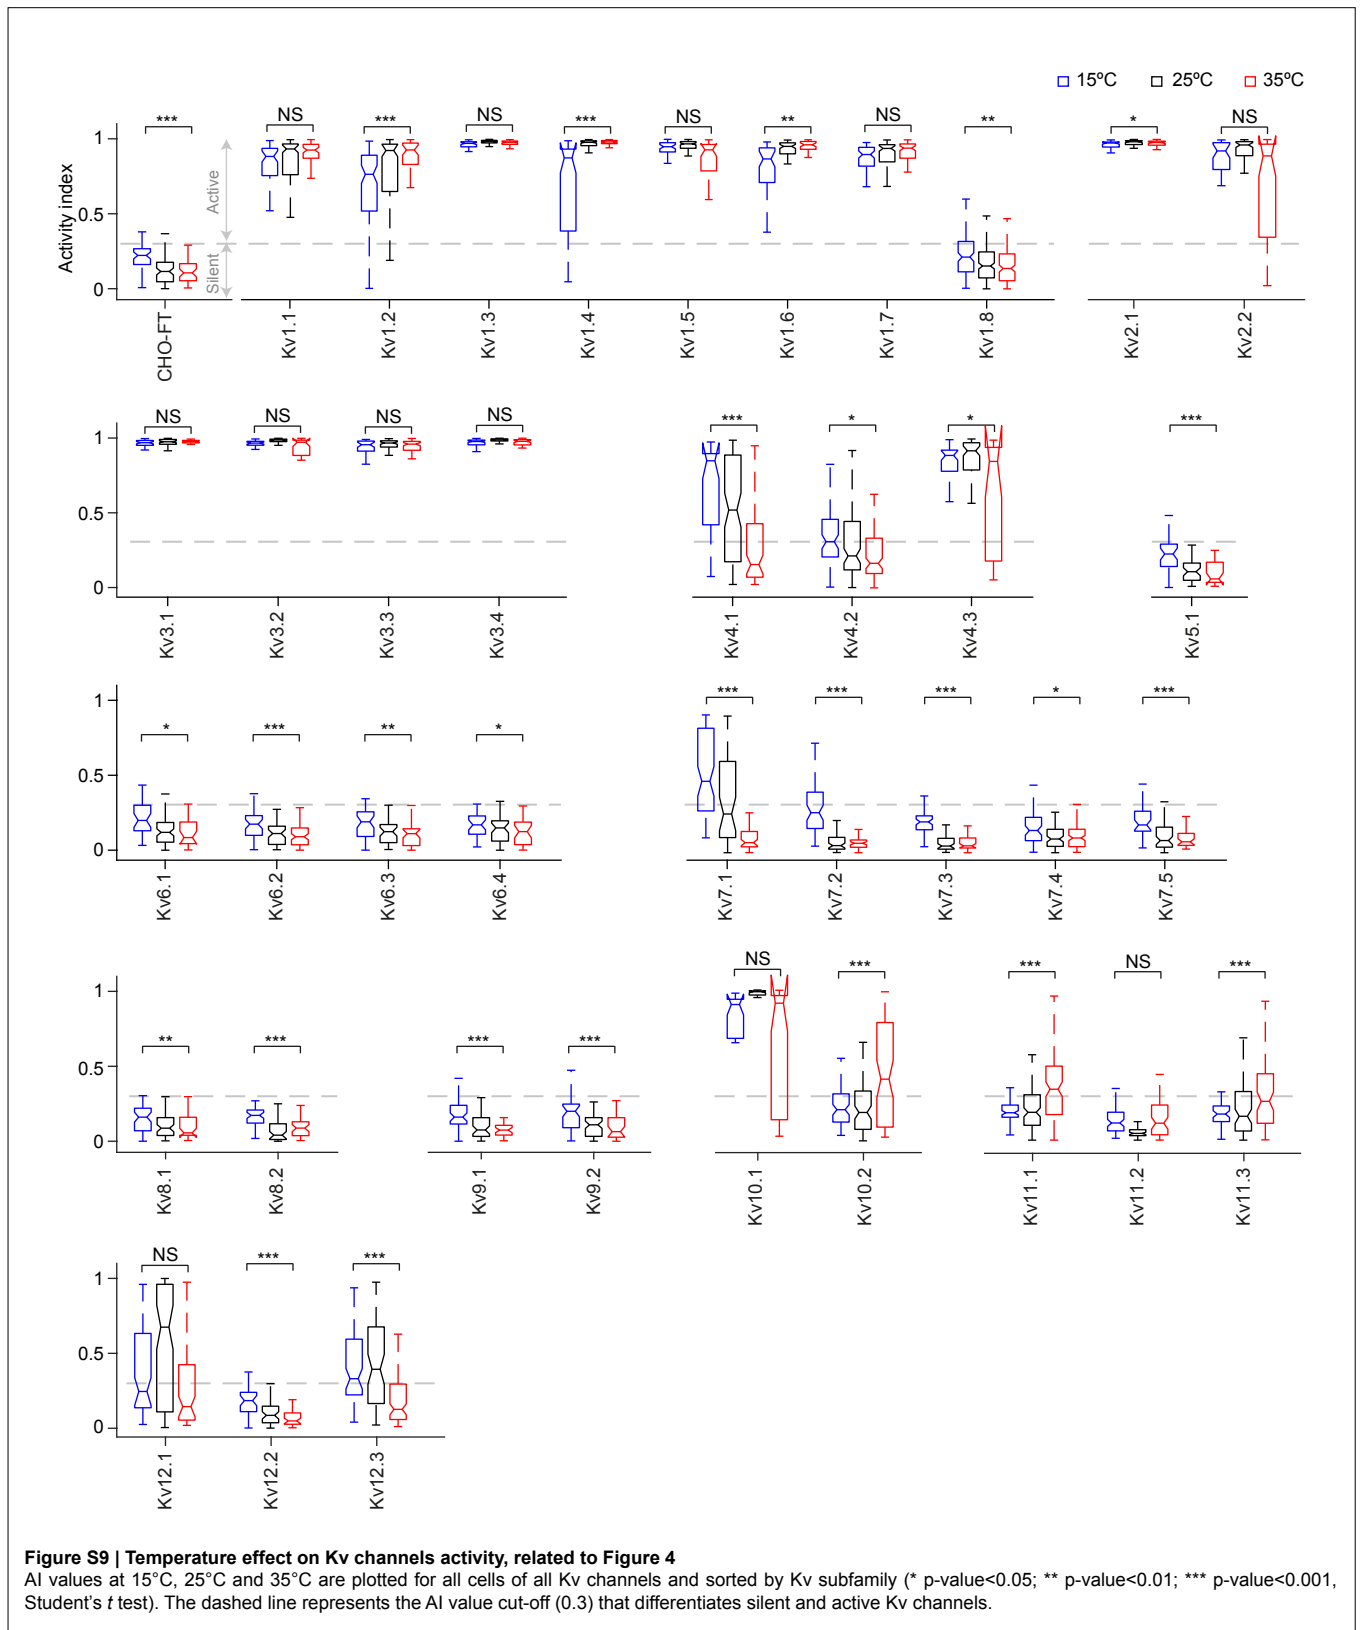

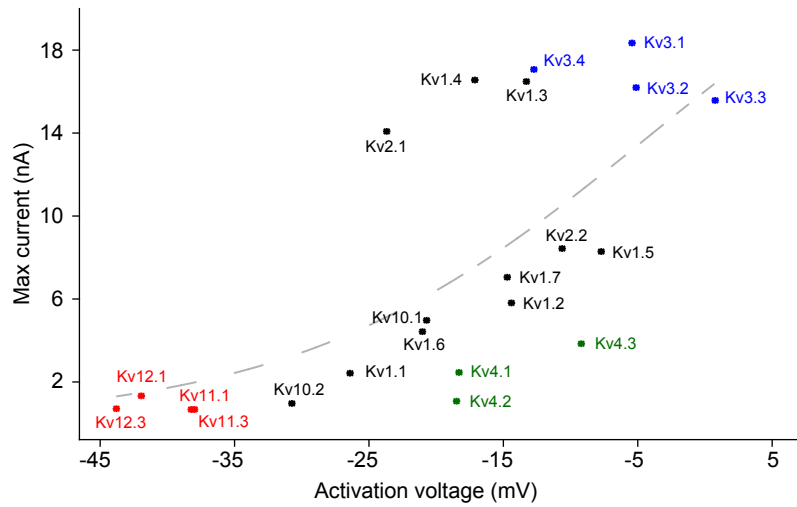

**Figure S10 | Max current against activation voltage for active Kv channels, related to Figure 5**

Observed maximum current (median values) in response to activation protocol at 35°C for all active Kv channels are plotted against their activation voltage (median values) indicating clusters of ion channel families activated at low voltage (in red) or high voltage (in blue).

**A Inactivation types at 25°C**

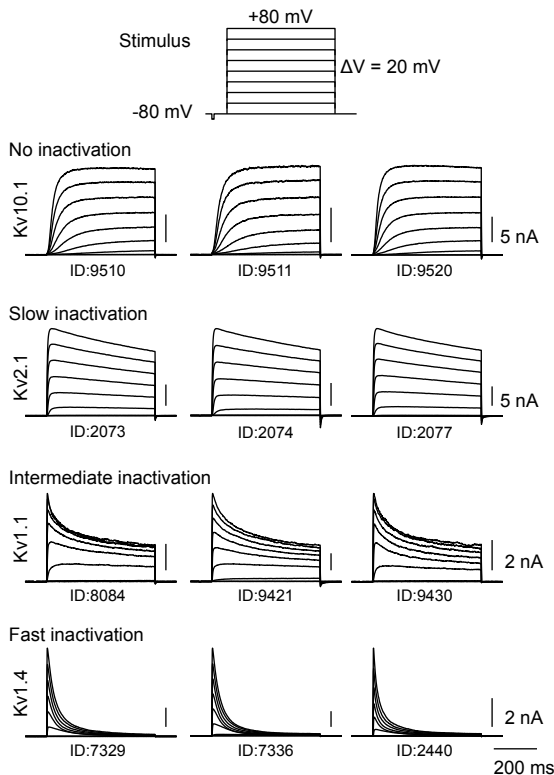

**B Delayed inactivation at 25°C**

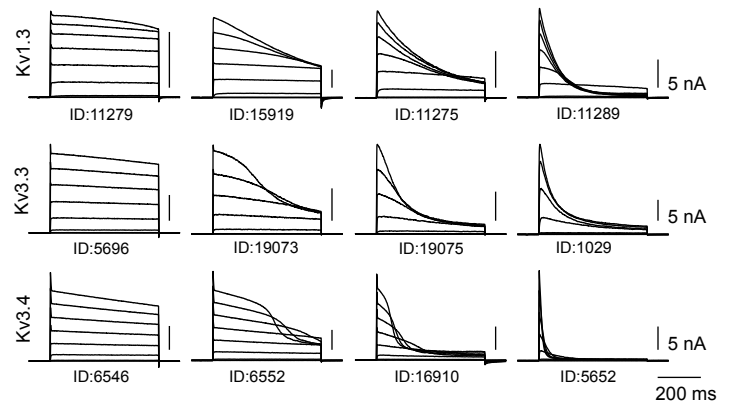

**C Delayed inactivation at 15 and 35°C**

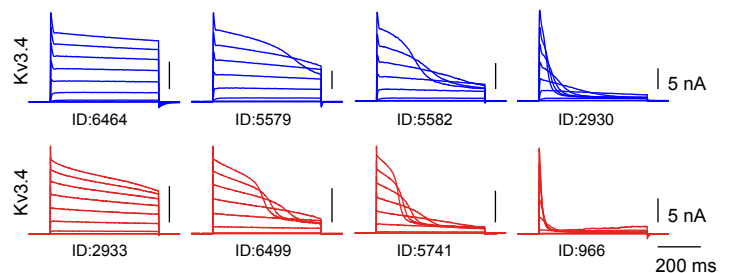

**Figure S11 | Delayed inactivation, related to Figure 6**

(A) The different patterns of inactivation (non-inactivation, slow inactivation, intermediate inactivation and fast inactivation) are represented by three exemplar traces for Kv10.1, Kv2.1, Kv1.1 and Kv1.4 cell lines in response to activation protocol (as depicted on top panel) at 25°C. (B) Representative traces of the range of kinetics, with delayed inactivation, for Kv1.3, Kv3.3 and Kv3.4, in response to activation protocol at 25°C are shown. (C) Representative traces of the range of kinetics, with delayed inactivation, for Kv3.4 in response to activation protocol at 15°C and 35°C are shown. Cell ID is indicated below each trace.



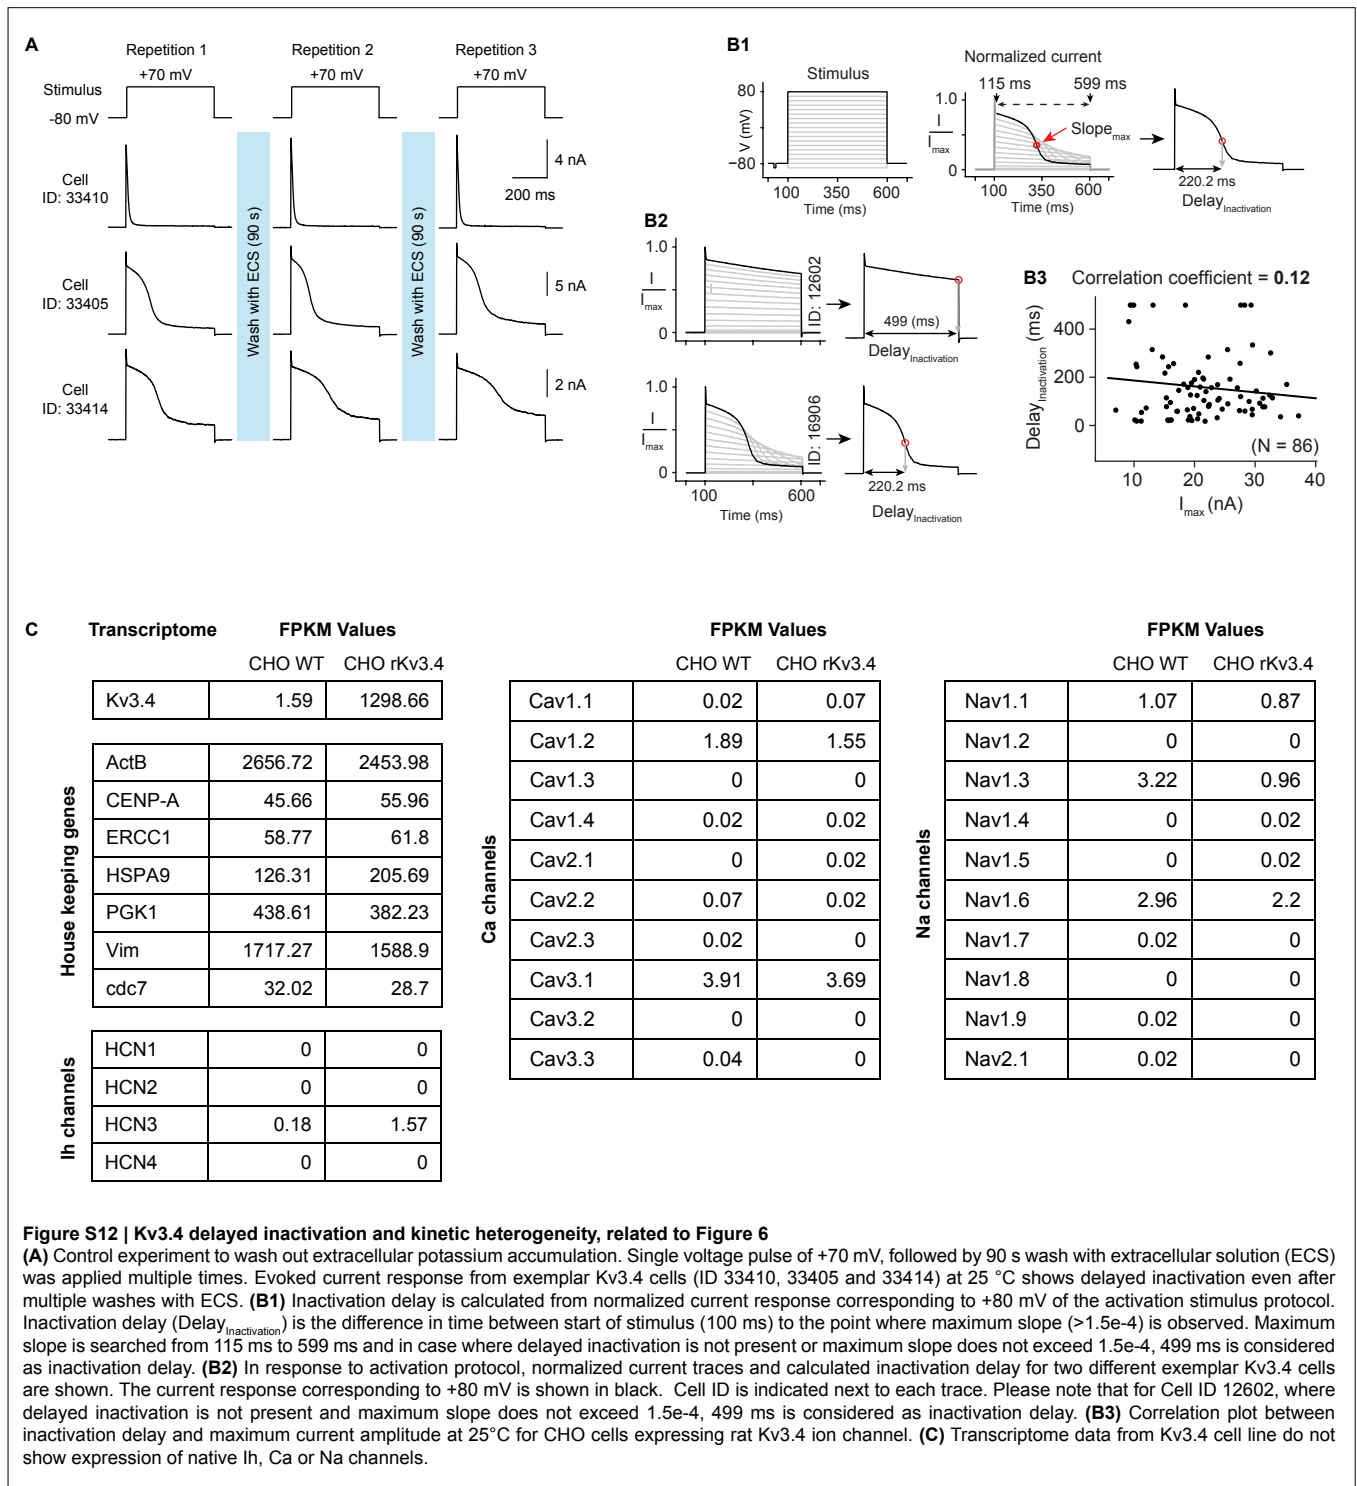

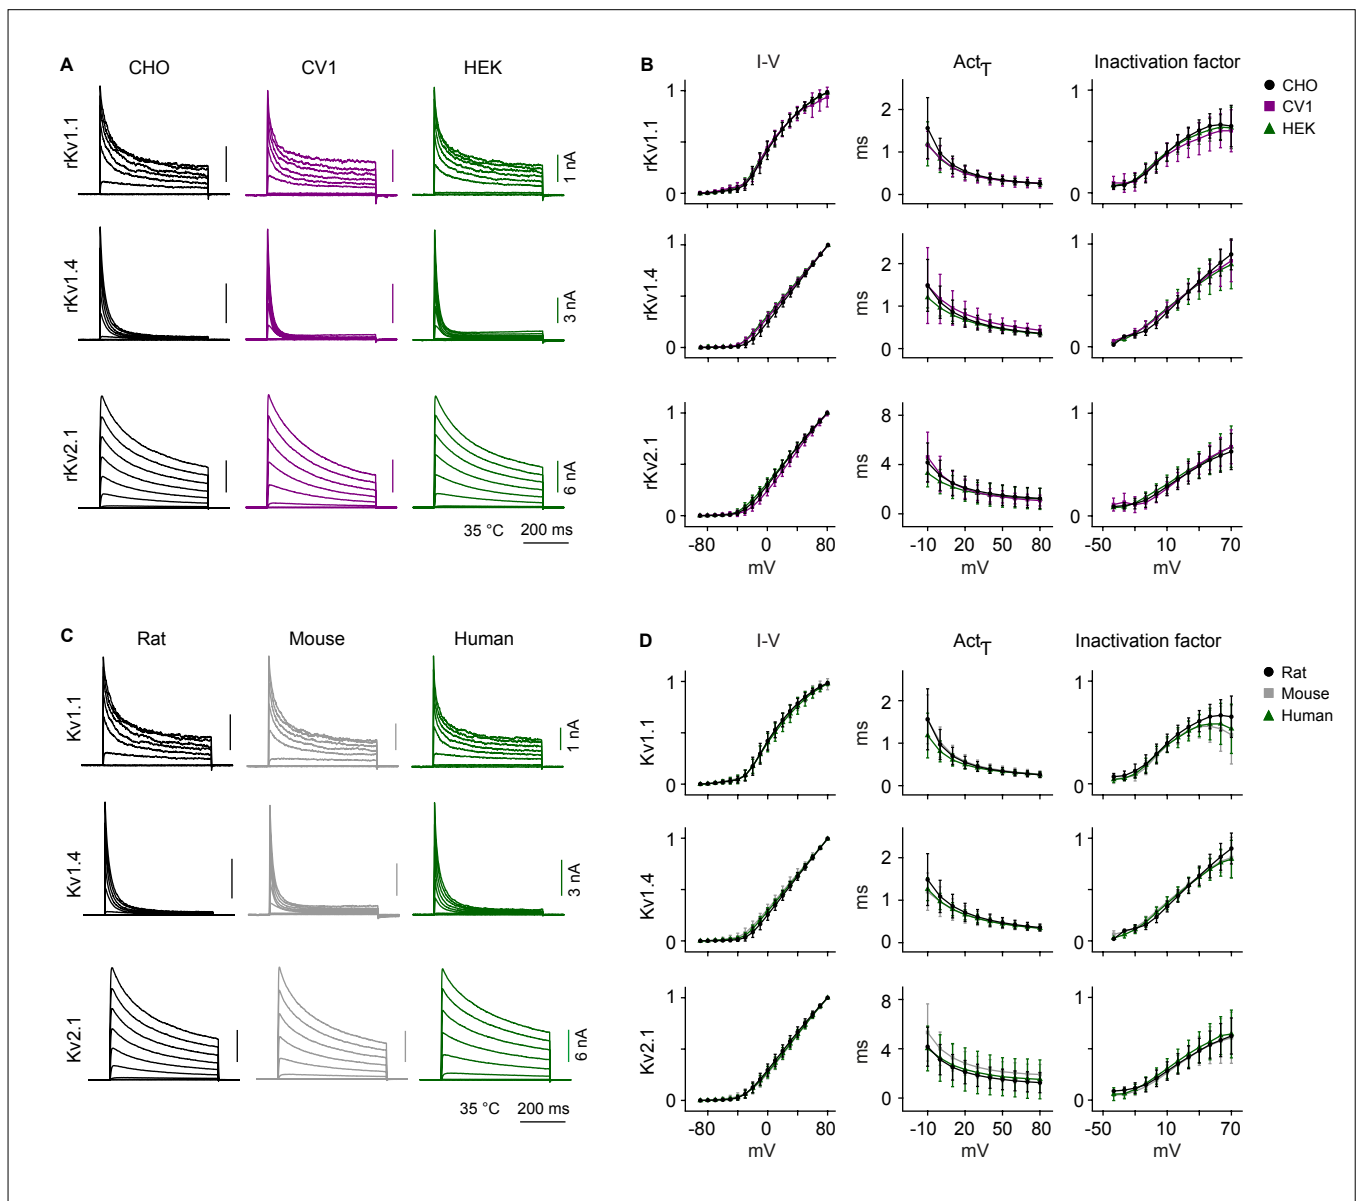

**Figure S13 | Kv channel kinetics across host cell lines and species at 35°C, related to Figure 9**

**(A-B)** Comparison of Kv kinetics across three mammalian host cell lines. **(A)** Representative current traces from rat Kv1.1, Kv1.4 and Kv2.1 expressed in the three different cell lines, in response to activation protocol at 35°C. **(B)** Median values for three kinetic features (I-V curve, activation time constant and inactivation factor calculated as explained in Figure 2) obtained from CHO, CV1 and HEK host cell lines for each Kv channel, overlaid for comparison.

**(C-D)** Comparison of Kv kinetics across three species. **(C)** Representative current traces for rat, mouse and human Kv1.1, Kv1.4 and Kv2.1 expressed in CHO cells, in response to activation protocol at 35°C. **(D)** Median values for three kinetic features (I-V curve, activation time constant and inactivation factor calculated as explained in Figure 2) obtained from rat, mouse and human genes of each Kv channel, overlaid for comparison.

Error bars are  $\pm$  S.D. The amplitude in nA and time in ms are indicated with scale bars.

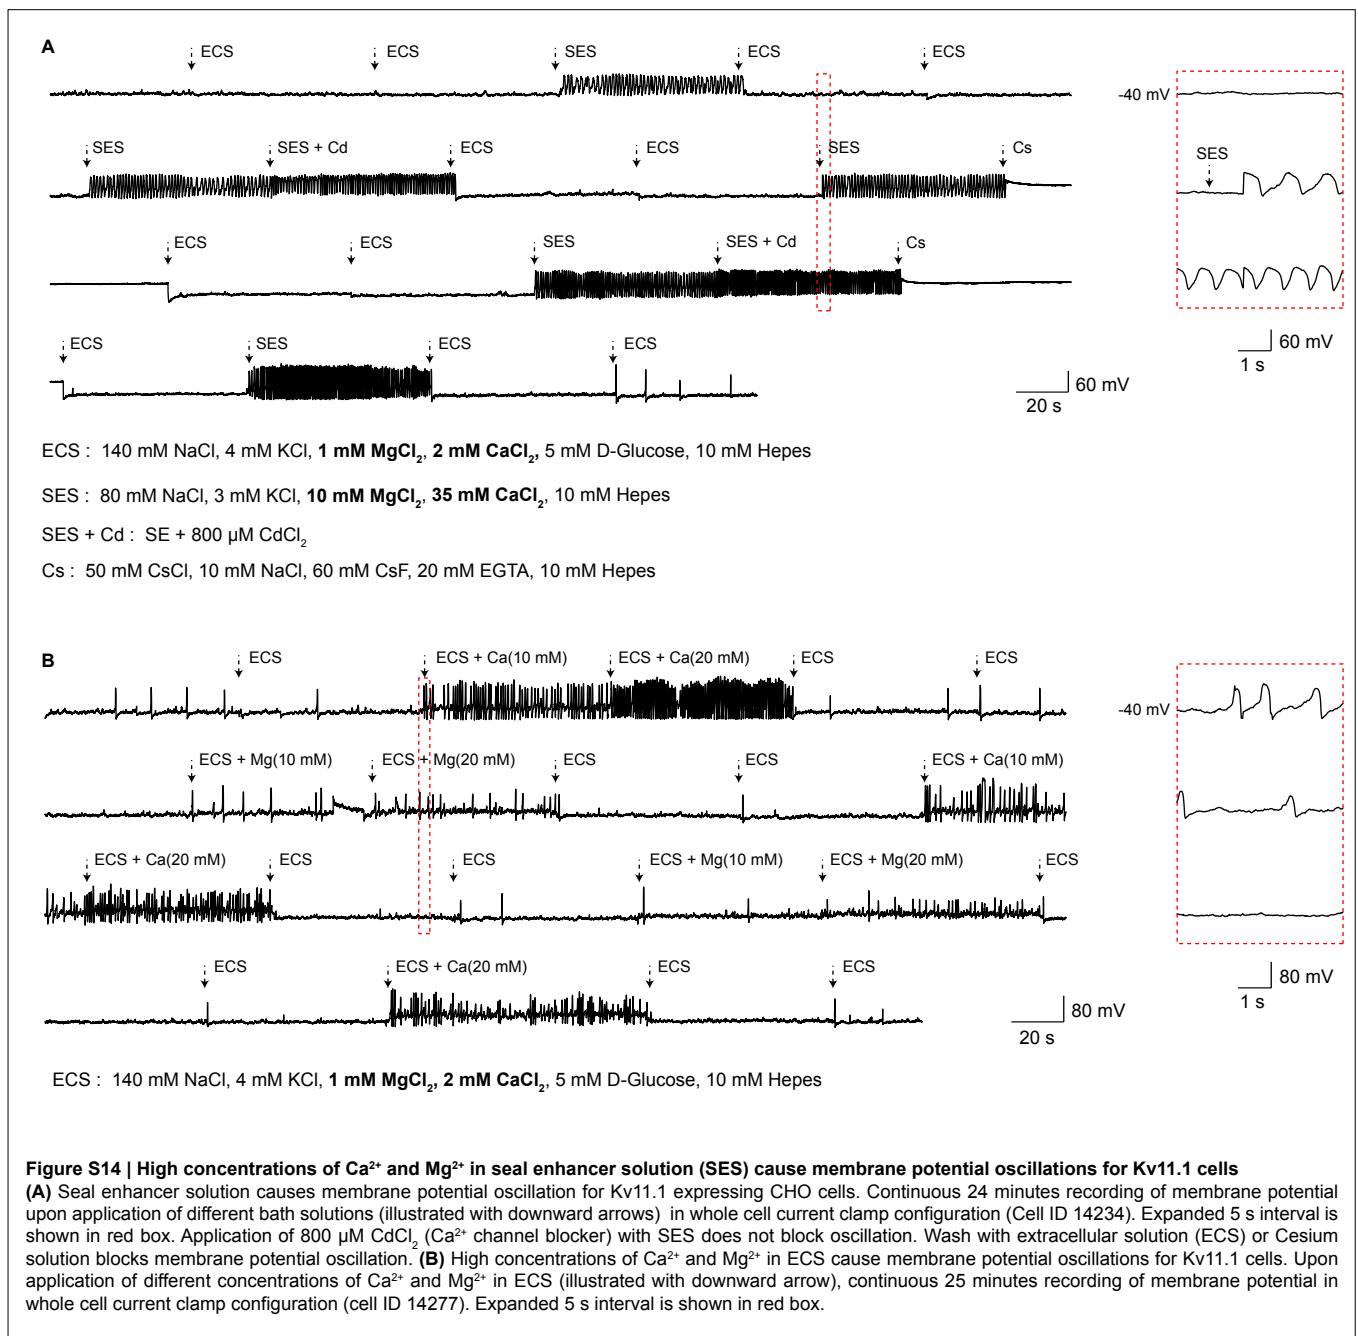

Supplement: Data_Sheet_2.pdf [file Data_Sheet_2.pdf]
