# Supplementary material for: A Kinetic Map of the Homomeric Voltage-Gated Potassium Channel (Kv) Family
Source: PubMed Central journal article supplement (PMC6710402; doi:10.3389/fncel.2019.00358), 2019-08-20
Supplement: Data_Sheet_3.pdf [file Data_Sheet_3.pdf]

**Table S1. Sequence description of the Kv channel genes used in the study, related to Figures 3, 4, 9, S7 and S12.**

Nucleotides variations with respect to the original refSeq are listed.

Synonymous modifications introduced in the cloning primers to improve primer quality are labeled as “modified nt”. Unreported missense variations shown in bold, have been corrected by mutagenesis and tested for functionality. These variations do not affect the activity of the corresponding channels (data not shown).

<sup>1</sup> *KCND3*-isoform 2 is the only isoform we detected in the rat brain. This isoform has a 19aa shorter C-tail compared to isoform 1.

<sup>2</sup> The amplified sequence of *KCNQ3* corresponds to a former sequence version (NM\_031597.3). The new version (NM\_031597.4) contains 117 supplementary nucleotides at the 5'-end that we did not detect in the rat brain.

<sup>3</sup> This deletion was previously reported as XM\_001071249, the only isoform we detected in the rat brain.

<sup>4</sup> We amplified two sequences for rat *KCNH1* and *KCNQ2*. As these Refseqs are provisional in NCBI, we chose sequences homologous to human and mouse isoform 1: NM\_031742 with an 81nt insertion at position nt952 for *KCNH1*; NM\_133322 with a 54nt insertion at position nt1248 and a few nucleotide differences for *KCNQ2*.

| Gene                | Protein | NCBI Ref Seq           | Nucleotide modifications compared to RefSeq                                                                              |
|---------------------|---------|------------------------|--------------------------------------------------------------------------------------------------------------------------|
| <b>Rat Kv genes</b> |         |                        |                                                                                                                          |
| <i>KCNA1</i>        | Kv1.1   | NM_173095              |                                                                                                                          |
| <i>KCNA2</i>        | Kv1.2   | NM_012970              | nt396>C (synonymous, reported in Ensembl)                                                                                |
| <i>KCNA3</i>        | Kv1.3   | NM_019270              | modified nt15>A; nt297>C (synonymous, rs199378897)                                                                       |
| <i>KCNA4</i>        | Kv1.4   | NM_012971              | Codons nt126>GCT and nt925>GGC (missense, reported in Ensembl)                                                           |
| <i>KCNA5</i>        | Kv1.5   | NM_012972              | modified nt15>T                                                                                                          |
| <i>KCNA6</i>        | Kv1.6   | NM_023954              |                                                                                                                          |
| <i>KCNA7</i>        | Kv1.7   | NM_001108914           | modified nt15>T                                                                                                          |
| <i>KCNA10</i>       | Kv1.8   | NM_0001191713          |                                                                                                                          |
| <i>KCNB1</i>        | Kv2.1   | NM_013186              |                                                                                                                          |
| <i>KCNB2</i>        | Kv2.2   | NM_054000              | nt2292>A (synonymous, not reported)                                                                                      |
| <i>KCNC1</i>        | Kv3.1   | NM_012856              |                                                                                                                          |
| <i>KCNC2</i>        | Kv3.2   | NM_139216              |                                                                                                                          |
| <i>KCNC3</i>        | Kv3.3   | NM_053997              | out of frame TAG insertion nt1981 (reported in Ensembl: Kcnc3-203)                                                       |
| <i>KCNC4</i>        | Kv3.4   | NM_001122776           | modified nt15>T; nt657>T (synonymous), nt1817>G (missense) (both reported in Ensembl), nt1492>G (missense, not reported) |
| <i>KCND1</i>        | Kv4.1   | NM_001105748           | modified nt12>A                                                                                                          |
| <i>KCND2</i>        | Kv4.2   | NM_031730              | nt1173>T (synonymous, not reported)                                                                                      |
| <i>KCND3</i>        | Kv4.3   | NM_001270963           | (= isoform 2) <sup>1</sup>                                                                                               |
| <i>KCNF1</i>        | Kv5.1   | NM_001169104           | nt31>G (missense, rs198924451)                                                                                           |
| <i>KCNG1</i>        | Kv6.1   | NM_001106545           |                                                                                                                          |
| <i>KCNG2</i>        | Kv6.2   | NM_001107372           |                                                                                                                          |
| <i>KCNG3</i>        | Kv6.3   | NM_133426              |                                                                                                                          |
| <i>KCNG4</i>        | Kv6.4   | NM_001107435           |                                                                                                                          |
| <i>KCNQ1</i>        | Kv7.1   | NM_032073              | modified nt12>T, nt1402>G (missense, not reported), nt1912>G (missense, reported in Ensembl)                             |
| <i>KCNQ2</i>        | Kv7.2   | Kcnq2_201 <sup>4</sup> | Δ(1526-1528), nt 2447>G (missense, not reported), 7 others synonymous variations (reported in NM_133322).                |
| <i>KCNQ3</i>        | Kv7.3   | NM_031597 <sup>2</sup> | nt1656>T, nt2127>C, nt2505>T (all synonymous: rs105980670, rs198097269, rs105394238)                                     |
| <i>KCNQ4</i>        | Kv7.4   | XM_008764109           |                                                                                                                          |
| <i>KCNQ5</i>        | Kv7.5   | NM_001134643           | Δ(1246-1302) <sup>3</sup> , nt1770>A, nt1815>C, nt2232>C, nt2748>A (all synonymous, not reported)                        |
| <i>KCNV1</i>        | Kv8.1   | NM_021697              |                                                                                                                          |
| <i>KCNV2</i>        | Kv8.2   | NM_001106370           | nt306>A (synonymous, not reported)                                                                                       |
| <i>KCNS1</i>        | Kv9.1   | NM_053954              | modified nt18>A                                                                                                          |
| <i>KCNS2</i>        | Kv9.2   | NM_023966              |                                                                                                                          |
| <i>KCNS3</i>        | Kv9.3   | NM_031778              | modified nt12>C; nt327>T, nt900>T (synonymous, not reported)                                                             |

|                       |        |                        |                                                                                                                                                    |
|-----------------------|--------|------------------------|----------------------------------------------------------------------------------------------------------------------------------------------------|
| <i>KCNH1</i>          | Kv10.1 | kcnh1_003 <sup>4</sup> |                                                                                                                                                    |
| <i>KCNH5</i>          | Kv10.2 | NM_133610              |                                                                                                                                                    |
| <i>KCNH2</i>          | Kv11.1 | NM_053949              | nt156>T (synonymous, not reported), codon nt900>CCT (missense, reported in Ensembl)                                                                |
| <i>KCNH6</i>          | Kv11.2 | NM_053937              | nt405>T, nt414>G, nt786>C (synonymous, rs107171774, rs106162519, rs105164542), nt2744>A (missense, rs105334634), nt1538>A (missense, not reported) |
| <i>KCNH7</i>          | Kv11.3 | NM_131912              |                                                                                                                                                    |
| <i>KCNH8</i>          | Kv12.1 | NM_145095              |                                                                                                                                                    |
| <i>KCNH3</i>          | Kv12.2 | NM_017108              |                                                                                                                                                    |
| <i>KCNH4</i>          | Kv12.3 | NM_053630              | modified nt15>A; nt1640>G (missense, not reported)                                                                                                 |
| <b>Mouse Kv genes</b> |        |                        |                                                                                                                                                    |
| <i>KCNA1</i>          | Kv1.1  | NM_010595              | modified nt15>A                                                                                                                                    |
| <i>KCNA4</i>          | Kv1.4  | NM_021275              | modified nt6>G and nt12>A                                                                                                                          |
| <i>KCNA5</i>          | Kv1.5  | NM_145983              | modified nt15>T and nt1794>T, and nt2557>A                                                                                                         |
| <i>KCNA6</i>          | Kv1.6  | NM_013568              |                                                                                                                                                    |
| <i>KCNB1</i>          | Kv2.1  | NM_008420              | modified nt12>T and nt2557>A                                                                                                                       |
| <b>Human Kv genes</b> |        |                        |                                                                                                                                                    |
| <i>KCNA1</i>          | Kv1.1  | NM_000217              |                                                                                                                                                    |
| <i>KCNA4</i>          | Kv1.4  | NM_002233              | modified nt9>G                                                                                                                                     |
| <i>KCNA5</i>          | Kv1.5  | NM_002234              | nt1149>C (synonymous, rs2359641)                                                                                                                   |
| <i>KCNA6</i>          | Kv1.6  | NM_002235              |                                                                                                                                                    |
| <i>KCNB1</i>          | Kv2.1  | NM_004975              | modified nt12>T                                                                                                                                    |

**Table S2. New variants cloned from rat brain, related to Table S1**

Brief description of seven new variants of the Kv genes cloned from rat brain.

| Gene         | Variant | Variation           | Effect                                                               |
|--------------|---------|---------------------|----------------------------------------------------------------------|
| <i>KCNA5</i> | A       | $\Delta(779-859)$   | change in reading frame leading to a premature STOP codon at nt846   |
|              | B       | $\Delta(490-868)$   | no change in reading frame but shorter protein (477 AA)              |
|              | C       | $\Delta(792-858)$   | change in reading frame leading to a premature STOP codon at nt900   |
| <i>KCNC3</i> | A       |                     | premature STOP codon at nt1518 leading to a shorter isoform (506 AA) |
| <i>KCND1</i> | A       | Different Exon 3    | premature stop codon and shorter protein                             |
| <i>KCNQ1</i> | A       | $\Delta(1733-1794)$ | change in reading frame leading to a new C-terminus sequence         |
| <i>KCNQ2</i> | A       | $\Delta(1525-1527)$ | 1 missing codon                                                      |

---

**Table S3. Transcriptome analysis of the three host cell lines, related to Figures S4 and 9**

Absolute count values (in FPKM) of the expression of ion channel-related genes in CHO-FT, HEK-FT or CV1-FT cell lines, obtained by transcriptome sequencing. Alignment was done on CHO genome for CHO-FT cell line, and on human genome for HEK-FT and CV1-FT cell lines. See attached xlsx file.

**Table S4. Absolute count values of the multiplexed gene expression assay, related to Figure S3**

See attached xlsx file.

**Table S5. Cell counts, related to Figures 3, 5, 6, S7 and S9**

Cell counts (N) for each ion channel group used for comparative chart of the Kv kinetic properties used in Figure 2, 3, 4, 5, 9, S7, S9, S13 and for overlay plots in Figure 6. See attached xlsx file.

**Table S6. Cloning primers list, related to Method “IC gene cloning”**

List of primers used for PCR amplification and cloning in pENTR/TOPO vector of rat, mouse and human Kv genes.

**Rat genes**

| Gene          | Accession n.  | Forward primer (5' to 3')               | Reverse primer (5' to 3')                |
|---------------|---------------|-----------------------------------------|------------------------------------------|
| <i>KCNA1</i>  | NM_173095     | CACCATGACGGTGATGTCAGGGGAGA              | TTAAACATCGGTCAGGAGC                      |
| <i>KCNA2</i>  | NM_012970     | CACCATGACAGTGGCTACCGGAGACCCAGTGGAT      | TCAGACATCAGTTAACATTTTGGTAATATTCAC        |
| <i>KCNA3</i>  | NM_019270     | CACCATGACCGTGGTCCAGGGGACC               | TTAGACATCAGTGAATATCTTTTGA                |
| <i>KCNA4</i>  | NM_012971     | CACCATGGAGGTGGCAATGGTGAG                | TCACACATCAGTCTCCACAGCCT                  |
| <i>KCNA5</i>  | NM_012972     | CACCATGGAGATCTCCCTTGTGCC                | TTACAAATCTGTTTCAGCGCTAGT                 |
| <i>KCNA6</i>  | NM_023954     | CACCATGAGATCGGAGAAATCCCTGA              | TCAAACCTCGGTGAGCATCCTT                   |
| <i>KCNA7</i>  | NM_001108914  | CACCATGCTATTTTACGTGCGGACACC             | TCACACCTCGGTACCATGTGTT                   |
| <i>KCNA10</i> | NM_0001191713 | CACCATGGATGTGTGTAGCTGGAGAG              | TCACTTCTGGACTTCTCTGCAG                   |
| <i>KCNB1</i>  | NM_013186     | CACCATGACGAAGCATGGCTCGCG                | TCAGATACTCTGATCCCTAGTGC                  |
| <i>KCNB2</i>  | NM_054000     | CACCATGGCAGAAAAGGCACCTCC                | TCACATGCTGGTCTCAGAGTGG                   |
| <i>KCNC1</i>  | NM_012856     | CACCATGGGCAAGGGGACGAGA                  | TCAAGTCACTCTCACAGCCTCT                   |
| <i>KCNC2</i>  | NM_139216     | CACCATGGGCAAGATCGAGAACAACG              | TTAAGTAAGAGATCTGGCCTCGG                  |
| <i>KCNC3</i>  | NM_053997     | CACCATGCTCAGCTCAGTGTGCGTCT              | CTAGAGGATGGAGGGCAGGGTGC                  |
| <i>KCNC4</i>  | NM_001122776  | CACCATGATCAGCTCGGTTTGTGTC               | TTAAAGAGCACAGGTGTGAGACA                  |
| <i>KCND1</i>  | NM_001105748  | CACCATGGCGGCAGGAGTGGC                   | TCACAGGAAGAGATCTTGACAG                   |
| <i>KCND2</i>  | NM_031730     | CACCATGGCAGCCGGTGTTC                    | TTACAAAGCAGACACCCTGACGA                  |
| <i>KCND3</i>  | NM_001270963  | CACCATGGCGGCAGGAGTTGC                   | TTAAATACACAGTGTATAATTTCTTCC              |
| <i>KCNF1</i>  | NM_001169104  | CACCATGGAACCGGGGCTTGC                   | TCACTTGCAGCTCTGTAGCC                     |
| <i>KCNG1</i>  | NM_001106545  | CACCATGACCTGTTACCAGGAGACAA              | TCAGTTGTTGCCCTAGTGTCTG                   |
| <i>KCNG2</i>  | NM_001107372  | CACCATGGCCCGGCTCCCGGGGCAC               | TCAGGGTCCCACCGGGCCTG                     |
| <i>KCNG3</i>  | NM_133426     | CACCATGACCTTCGGGCGCG                    | TTAATTCAGGAACCTCAGCGGAG                  |
| <i>KCNG4</i>  | NM_001107435  | CACCATGCCATGTCTTCCCGAG                  | CTACATGTAGCGGCCTGGGGAG                   |
| <i>KCNQ1</i>  | NM_032073     | CACCATGGACACGGCTTCCCTCCC                | TCAGGAGCCTTCATCAGGGCCTG                  |
| <i>KCNQ2</i>  | NM_133322     | CACCATGGTGCAAAAGTCGCGCAAC               | TCACTTCTAGGCCCTGCCCAA                    |
| <i>KCNQ3</i>  | NM_031597     | CACCATGGGGCTCAAGGCTCGCA                 | CTAAGTGGGCTTGTGGAAGGGG                   |
| <i>KCNQ4</i>  | XM_008764109  | CACCATGGCCGAGGCCCCCGG                   | TCAGTCCATGTTGGTGTGACTG                   |
| <i>KCNQ5</i>  | NM_001134643  | F1-GCCGCCCCCTTACCATGCCCCGCCACCACGC      | R1-AACTTCCGCTTTGCAACATGAAACTTCATGATTCTGA |
|               |               | F2-TGCAAAGCGGAAGTTTAAAGAAACATTACGCCATAT | R2-GGCGCGCCACCCTTTTAGTTCAGTTTGACGTGAGGCA |
| <i>KCNV1</i>  | NM_021697     | CACCATGGATCTGTCACCCGCAACC               | TTAAAACCAGAAATCATCTCCACC                 |
| <i>KCNV2</i>  | NM_001106370  | CACCATGCTGAAACAGAGCACCGAGA              | TTAATTCCTTGCCTTGTGGCGGACTG               |
| <i>KCNS1</i>  | NM_053954     | CACCATGGTGAGCGAGTTCCGGGTCC              | TTAATAACTGTGAGATTTTGCAGGC                |
| <i>KCNS2</i>  | NM_023966     | CACCATGACCCGCCAGAGCCTGTG                | CTAATGTAGAGAGTCTGCTAAAC                  |
| <i>KCNS3</i>  | NM_031778     | CACCATGGTGTGTTGGCGAGTTTTC               | TCATTTTGCAGTACAGTTCTCCA                  |
| <i>KCNH1</i>  | Not available | CACCATGACCATGGCTGGCGG                   | TCAGCTTGGCCAAAAATGTCTC                   |
| <i>KCNH5</i>  | NM_133610     | F1-GCCGCCCCCTTACCATGCCGGGGGCAAGA GAG    | R1-CTAAGGCCTTTTCGGGACCTGATATAAATTTCA GGA |
|               |               | F2-CCCGAAAGGCCTTAGTGAACGAGTCATGGAT TAC  | R2-GGCGCGCCACCCTTTTAAAGTTGATTTCATCTTTG   |
| <i>KCNH2</i>  | NM_053949     | CACCATGCCGGTGGGAGGGGC                   | CTAACTGCCTGGATCTGAGCC                    |
| <i>KCNH6</i>  | NM_053937     | CACCATGCCAGTCCGAGGGG                    | CTAACTCCTTGTGAATCCAGGATCGGA              |
| <i>KCNH7</i>  | NM_131912     | CACCATGCCTGTTTCGAGGGG                   | TTACTTTCCCGGAAGACCAGGAT                  |
| <i>KCNH8</i>  | NM_145095     | CACCATGCCGGTTATGAAAGGATTGCT             | TTATACGTTTATGGCTTTGCTGT                  |

|              |           |                                                    |                                             |
|--------------|-----------|----------------------------------------------------|---------------------------------------------|
| <i>KCNH3</i> | NM_017108 | F1-<br>GCCGCCCCCTTCACCATGCCGGCCATGCCGGGG<br>CTC    | R1-TCGAGCATGCCGCTGCTTGAGGGGCTTGGGA<br>TGC   |
|              |           | F2-GCAGCGCATGCTCGAGTACTTCCAAGCCACC<br>TGG          | R2-GGCGCGCCACCCTTTCAGACTCCTGTGCCCT<br>CCT   |
| <i>KCNH4</i> | NM_053630 | F1-<br>GCCGCCCCCTTCACCATGCCGGTCATGAAAGGG<br>TTGCTG | R1-GACGATGCACTCGGATGAAGTCCTTGAGATC          |
|              |           | F2-CATCCGAGTGCATCGTCTGCCCGCCCACT                   | R2-GGCGCGCCACCCTTTCAGTGAATGTGTCTG<br>ACCCAG |

### Mouse genes

| Gene         | Accession n. | Forward primer (5' to 3')  | Reverse primer (5' to 3') |
|--------------|--------------|----------------------------|---------------------------|
| <i>KCNA1</i> | NM_010595    | CACCATGACGGTGATGTCAGGGGAGA | TTAAACATCGGTCAGGAGC       |
| <i>KCNA4</i> | NM_021275    | CACCATGGAGGTGGCAATGGTGAG   | TCACACATCAGTCTCCACAGCCT   |
| <i>KCNA5</i> | NM_145983    | CACCATGGAGATCTCCCTTGTGCC   | TTACAAATCTGTTTCACGGCTAGT  |
| <i>KCNA6</i> | NM_013568    | CACCATGAGATCGGAGAAATCCCTGA | TCAAACCTCGGTGAGCATCCTT    |
| <i>KCNB1</i> | NM_008420    | CACCATGCCGGCGGGTATGACGAA   | TCAGATACTCTGATCCTAGTGC    |

### Human genes

| Gene         | Accession n. | Forward primer (5' to 3')   | Reverse primer (5' to 3') |
|--------------|--------------|-----------------------------|---------------------------|
| <i>KCNA1</i> | NM_000217    | CACCATGACGGTGATGCTGCGGGAGAA | TTAAACATCGGTCAGTAGCTTGC   |
| <i>KCNA4</i> | NM_002233    | CACCATGGAGGTGGCAATGGTGAG    | TCACACATCAGTCTCCACAGCCT   |
| <i>KCNA5</i> | NM_002234    | CACCATGGAGATCGCCCTAGTGC     | TCACAAATCTGTTTCCCGGCTGG   |
| <i>KCNA6</i> | NM_002235    | CACCATGAGATCGGAGAAATCCCTTAC | TCAGACCTCCGTGAGCATTCTTT   |
| <i>KCNB1</i> | NM_004975    | CACCATGCCGGCGGGTATGACGAA    | TCAGATGCTCTGATCTCGTGTGC   |

**Table S7. Screening primers list, related to Method “Cell line validation by RT-PCR”**

List of primers used for the amplification of the Kv genes by RT-PCR for cell lines validation, with expected amplification size.

| Gene          | Species           | Forward primer (5' to 3') | Reverse primer (5' to 3') | Size (bp) |
|---------------|-------------------|---------------------------|---------------------------|-----------|
| <i>KCNA1</i>  | rat, mouse, human | CATGACCACTGTGGGATACG      | AGCAACTGAGCCTGCTCTTC      | 177       |
| <i>KCNA2</i>  | rat               | TTATCACCTGTGGGACAGAG      | TGACCCCAATGAAGAGGAAG      | 219       |
| <i>KCNA3</i>  | rat               | GGAGACCCTGTGCATCATCT      | TCAGGATGGCCAGTGACATA      | 197       |
| <i>KCNA4</i>  | rat, mouse, human | CGGGTGTCTTAACCATTGCT      | TGACTTGTCCCCAGGAAG        | 188       |
| <i>KCNA5</i>  | rat, mouse        | CTCCGACGTCTGGACTCAAT      | CCCGGAGATGTTTATGAGGA      | 248       |
|               | human             | CGAGGATGAGGGCTTCATTA      | CTGAACCTCAGGCAGGGTCTC     | 186       |
| <i>KCNA6</i>  | rat, mouse        | CCGGTACCGGTCAATTGTCTC     | TCTGCATAAGCTCGATGTGG      | 208       |
|               | human             | GCGGCTGGTGATCAATATCT      | CTCCTCCAGGAAAATGTCCA      | 238       |
| <i>KCNA7</i>  | rat               | TTCTTGTGGTGGAGACCCCT      | TAGGATGGCCAGGGACATAG      | 205       |
| <i>KCNA10</i> | rat               | ATCTTCAAGCTCTCCGACA       | GTTGTGATGGTGACCACAGC      | 212       |
| <i>KCNB1</i>  | rat               | AAGGAGCAGATGAACGAGGA      | GCGATGGTGGACAGGACGAT      | 194       |
|               | mouse             | AAGGAGCAGATGAACGAGGA      | GCAATGGTGGAGAGGACAAT      | 194       |
|               | human             | AAAGAGCAGATGAACGAGGA      | GCAATGGTGGAGAGGACGAT      | 194       |
| <i>KCNB2</i>  | rat               | CCCTTCTATCCCATCATT        | TTGATATTGGCCGACTCTCC      | 208       |
| <i>KCNC1</i>  | rat               | GAAGACTGCCCCACATAGA       | CACTCTCACAGCCTCTGTCC      | 204       |
| <i>KCNC2</i>  | rat               | GTACCCCAAAACATGGTCAG      | GTAGGTGAGCTTGCCAGAGG      | 192       |
| <i>KCNC3</i>  | rat               | TTATGGGATTGCCCTCTCTG      | TGATCGGGCTTGTCTTCT        | 183       |
| <i>KCNC4</i>  | rat               | CAGAAGCTTCCCAAGAAACG      | TAGCGTCACCATTCTGCTTG      | 184       |
| <i>KCND1</i>  | rat               | CCTACGTGTGTTTCGGGTCT      | GGGATGCTTGTGAAGTTGGT      | 201       |
| <i>KCND2</i>  | rat               | TGAGTGCATCTCGGCTTATG      | TCTGCCTAGCAGTCATGGTG      | 182       |
| <i>KCND3</i>  | rat               | GGCTACACCCTGAAGAGCTG      | GCCAAATATCTTCCCAGCAA      | 222       |
| <i>KCNF1</i>  | rat               | CCTGCAGACCCTCACCTACG      | CACTGTGGTCATGGTATGA       | 186       |
| <i>KCNG1</i>  | rat               | CGAGAATGAGATGGCAGACA      | ATCAGCACCCGTTCTTGTTT      | 243       |
| <i>KCNG2</i>  | rat               | CATCCTGCCCTTCTACGTGT      | GAGGAAGAGCAGCAGCAGTC      | 214       |
| <i>KCNG3</i>  | rat               | CGATGCTACCGAGAGATGGT      | ACGATCCCACTGACAACACA      | 245       |
| <i>KCNG4</i>  | rat               | CTGGAGCACCTGGATGCCT       | ATGCCCCAGTAGCTCAGCTC      | 215       |
| <i>KCNQ1</i>  | rat               | GGCGCATGCAGTACTTTGTA      | TGTCACCTTGTCTTCCACCC      | 245       |
| <i>KCNQ2</i>  | rat               | TCGACATCATGGTGTGATT       | CCAATGTACCAGCAGTCAC       | 205       |
| <i>KCNQ3</i>  | rat               | ATCGGGTTTCGCTTCTAAT       | TCTTCTGTCTATGGGGTCTCC     | 214       |
| <i>KCNQ4</i>  | rat               | AGTATGCGCTTCTCGAGAT       | GAGTTGGCATCCTTCTCAGC      | 182       |
| <i>KCNQ5</i>  | rat               | TTGTTGCCTCCAAGGAAAAC      | GAGCCACTTGACTCACTGCC      | 208       |
| <i>KCNV1</i>  | rat               | TCCGACAAAAGCTCTGGGAT      | AGGAAGTGGCACCTGTCTTT      | 238       |
| <i>KCNV2</i>  | rat               | ACTCCAACCCAGCTGTCTAC      | CTTTGCCTCGTAGTCATCGC      | 162       |
| <i>KCNS1</i>  | rat               | ACAAGTGTTCGCTCATGC        | GTCGAAGCCCAGTTCTTTT       | 193       |
| <i>KCNS2</i>  | rat               | CTGAGCTCTTCCCCTACGTG      | TCTCCTGCTCAGTTTCCACT      | 177       |
| <i>KCNS3</i>  | rat               | GAAGTGGATGACCCGTGTGCT     | ACGTGGCATAGAAGGGAATG      | 163       |
| <i>KCNH1</i>  | rat               | TGGTCCCTTACAACGTCTCC      | ACTGAACAGGCTGCTGATGC      | 271       |
| <i>KCNH5</i>  | rat               | ATGCCAACCAACCGTTAC        | TCAGCTCTCATGTCTTGGG       | 181       |
| <i>KCNH2</i>  | rat               | TGGATGCACTCCAGAGACAG      | AACCTGAGAAAGCGAGTCCA      | 209       |
| <i>KCNH6</i>  | rat               | GAAGCTGGACCGCTATTCTG      | GGCGGTGACATACTTGTCTT      | 235       |
| <i>KCNH7</i>  | rat               | ATCCCGCAACTCACTCTGAA      | CACTGCTTTGAAAGGGCTGT      | 234       |
| <i>KCNH8</i>  | rat               | AAAACCAAGCAGGAAGCTGA      | ACGCAGCTCCAATCTCTGAT      | 238       |
| <i>KCNH3</i>  | rat               | GAGTACCTCATTACCAAGG       | GGGGCAACTCAGGGTACAG       | 250       |
| <i>KCNH4</i>  | rat               | AATGTACAGCCATCATCCA       | GTTGACGGCCCATGTAGTCT      | 153       |
| <i>GAPDH</i>  | rat               | TTGTGATGGGTGTGAACCAC      | GGATGCAGGGATGATGTCTT      | 238       |
| <i>GAPDH</i>  | human             | CGAGATCCCTCCAAAATCAA      | TGACGATCTTGAGGCTGTTG      | 206       |

**Table S8. APC automation steps, related to Method “APC automation”**

| Steps              | Sub-steps                                  | Comment                                                                                  |
|--------------------|--------------------------------------------|------------------------------------------------------------------------------------------|
| Initialize         | Initialize amplifier and Patchliner        | Specify stimulus protocol file. Location of IC/EC/SE solutions                           |
|                    | Initialize log file with meta data         | User, experiment details, cell line, passage, induction, temperature, cell count         |
| Prepare chips      | Fill IC and EC                             | Volume 10 $\mu$ l, Speed 40                                                              |
| Catch cells        | Set pressure                               | -100 mBar                                                                                |
|                    | Set Vhold -20 mV                           |                                                                                          |
|                    | Get cells from cell hotel                  |                                                                                          |
|                    | Wait 30 s                                  |                                                                                          |
|                    | Set Vhold -80 mV                           |                                                                                          |
| Make seal          | Add seal enhancer                          |                                                                                          |
|                    | Wait for 30 s                              |                                                                                          |
| Whole cell patch   | Apply atmospheric pressure                 |                                                                                          |
|                    | Wait for whole cell                        | Suction is applied to the cells until the whole cell configuration is reached            |
|                    | Wash with EC                               | To remove seal enhancer                                                                  |
| Whole cell setting | Auto C-slow and R-series                   | Apply auto compensation for C-slow and R-series                                          |
|                    | Seal quality control                       | If seal resistance is less than 100 M, then the channel gets turned off                  |
| Current clamp      | Record resting potential of cells          |                                                                                          |
| Voltage clamp      | Apply Activation protocol                  |                                                                                          |
| Protocol loop      | Auto C-slow                                | Apply auto compensation for C-slow                                                       |
|                    | Activation protocol                        |                                                                                          |
|                    | Ramp                                       |                                                                                          |
|                    | Deactivation                               |                                                                                          |
|                    | AP                                         |                                                                                          |
|                    | Inactivation                               |                                                                                          |
|                    | Wash with EC                               |                                                                                          |
| End loop           |                                            | End loop if repetition >2                                                                |
|                    | Recovery                                   |                                                                                          |
| Save files         | Save files in format YYMMDD_00X            | Where YY is year, MM is month, DD is date and X is the experiment number for a given day |
| Clean up           | Clean pipettes and move to next recordings |                                                                                          |
